# Supplementary material for: A Systematic Review of the Effects of Temperature on<em> Anopheles</em> Mosquito Development and Survival: Implications for Malaria Control in a Future Warmer Climate
Source: Preprints.org preprint supplement (doi:10.20944/preprints202105.0054.v1), 2021-05-05
Supplement: Supplementary file 3 [file supplementary]

## Supplementary information

**Table SI: Search terms and search results from databases**

| **Database** | **Search Term** | **Search Results** |
| --- | --- | --- |
| Scopus | TITLE-ABS-KEY ( "anopheles mosquito" OR "malaria" ) AND ( "temperature" OR season ) AND ( "development time" OR "survival" OR "longevity" OR "fecundity" OR "gonotrophic cycle" OR "biting rate" OR "enzyme" OR "insecticide" ) | **5,926** |
| PubMed | ("anopheles mosquito" OR "malaria" ) AND ( "temperature" OR season ) AND ( "development time" OR "survival" OR "longevity" OR "fecundity" OR "gonotrophic cycle" OR "biting rate" OR "enzyme" OR "insecticide") | **1,156** |
| Science Direct | ("Anopheles mosquito") AND ("temperature" OR "season") AND ("longevity" OR "fecundity" OR "gonotrophic cycle" OR "development time" OR "enzyme" OR "insecticide") | **1,403** |
| Google Scholar | ("Anopheles mosquito") AND ("temperature" OR "season") AND ("longevity" OR "fecundity" OR "gonotrophic cycle" OR "development time" OR "enzyme" OR "insecticide") | **8,130** |
| ProQuest | ("Anopheles mosquito") AND ("temperature" OR "season") AND ("longevity" OR "fecundity" OR "gonotrophic cycle" OR "development time" OR "enzyme" OR "insecticide") | **850** |
| Web of Science | ("Anopheles mosquito") AND ("temperature" OR "season") AND ("longevity" OR "fecundity" OR "gonotrophic cycle" OR "development time" OR "enzyme" OR "insecticide") | **17** |
| Hand search |  | 4 |

**Table S2: List of studies excluded with reasons**

| **Sn** | **Author name** | **Reason for exclusion** |
| --- | --- | --- |
| 1 | [Abiodun et al. [1]](#_ENREF_1) | 1 |
| 2 | [Abiodun et al. [2]](#_ENREF_2) | 1 |
| 3 | [Abiodun et al. [3]](#_ENREF_3) | 1 |
| 4 | [Agusto et al. [4]](#_ENREF_4) | 1 |
| 5 | [Beck-Johnson [5]](#_ENREF_5) | 1 |
| 6 | [Beck-Johnson et al. [6]](#_ENREF_6) | 1 |
| 7 | [Beck-Johnson et al. [7]](#_ENREF_7) | 1 |
| 8 | [Blanford et al. [8]](#_ENREF_8) | 2 |
| 9 | [Charlwood and Braganca [9]](#_ENREF_9) | 3 |
| 10 | [Christiansen-Jucht et al. [10]](#_ENREF_10) | 1 |
| 11 | [Culler et al. [11]](#_ENREF_11) | 1 |
| 12 | [Ewing et al. [12]](#_ENREF_12) | 1 |
| 13 | [Glunt et al. [13]](#_ENREF_13) | 2 |
| 14 | [Gonçalvez De Carvalho et al. [14]](#_ENREF_14) | 3 |
| 15 | [Lindsay et al. [15]](#_ENREF_15) | 4 |
| 16 | [Lunde et al. [16]](#_ENREF_16) | 1 |
| 17 | [Lyons et al. [17]](#_ENREF_17) | 1 |
| 18 | [Mordecai et al. [18]](#_ENREF_18) | 2 |
| 19 | [Mukhtar et al. [19]](#_ENREF_19) | 1 |
| 20 | [Murdock et al. [20]](#_ENREF_20) | 2 |
| 21 | [Murdock et al. [21]](#_ENREF_21) | 2 |
| 22 | [Okechukwu et al. [22]](#_ENREF_22) | 4 |
| 23 | [Okuneye et al. [23]](#_ENREF_23) | 1 |
| 24 | [Owiti and Christopher [24]](#_ENREF_24) | 3 |
| 25 | [Owusu et al. [25]](#_ENREF_25) | 2 |
| 26 | [Paaijmans et al. [26]](#_ENREF_26) | 3 |
| 27 | [Paaijmans et al. [27]](#_ENREF_27) | 2 |
| 28 | [Paaijmans et al. [28]](#_ENREF_28) | 1 |
| 29 | [Parham and Michael [29]](#_ENREF_29) | 1 |
| 30 | [Parham and Michael [30]](#_ENREF_30) | 1 |
| 31 | [Parham et al. [31]](#_ENREF_31) | 1 |
| 32 | [Shimaponda-Mataa et al. [32]](#_ENREF_32) | 1 |
| 33 | [Wang et al. [33]](#_ENREF_33) | 1 |
| 34 | [Wei-Ming et al. [34]](#_ENREF_34) | 4 |
| 35 | [Yamana and Eltahir [35]](#_ENREF_35) | 1 |
| 36 | [Zakharova et al. [36]](#_ENREF_36) | 4 |

*1 = mathematical models; 2 = Opinions/Letters/Reports; 3 = Study did not report on any of the outcomes of interest; 4 = Full text not available*

**References**

1. Abiodun, G.J., Maharaj, R., Witbooi, P., and Okosun, K.O., *Modelling the influence of temperature and rainfall on the population dynamics of Anopheles arabiensis.* Malaria Journal, 2016. **15**(1): p. 364.

2. Abiodun, G.J., Witbooi, P., and Okosun, K.O., *Modeling and analyzing the impact of temperature and rainfall on mosquito population dynamics over Kwazulu-Natal, South Africa.* International Journal of Biomathematics, 2017. **10**(4).

3. Abiodun, G.J., Witbooi, P., and Okosun, K.O., *Modelling the impact of climatic variables on malaria transmission.* Hacettepe Journal of Mathematics and Statistics, 2018. **47**(2): p. 219-235.

4. Agusto, F., Gumel, A., and Parham, P., *Qualitative assessment of the role of temperature variations on malaria transmission dynamics.* Journal of Biological Systems, 2015. **23**(04): p. 1550030.

5. Beck-Johnson, L.M., *Temperature impacts on mosquito population dynamics and malaria transmission.* 2013.

6. Beck-Johnson, L.M., Nelson, W.A., Paaijmans, K.P., Read, A.F., Thomas, M.B., and Bjørnstad, O.N., *The effect of temperature on Anopheles mosquito population dynamics and the potential for malaria transmission.* PLOS ONE, 2013. **8**(11): p. e79276.

7. Beck-Johnson, L.M., Nelson, W.A., Paaijmans, K.P., Read, A., Thomas, M.B., and Bjørnstad, O.N., *The importance of temperature fluctuations in understanding mosquito population dynamics and malaria risk.* Royal Society Open Science, 2017. **4**(3).

8. Blanford, J.I., Blanford, S., Crane, R.G., Mann, M.E., Paaijmans, K.P., Schreiber, K.V., et al., *Implications of temperature variation for malaria parasite development across Africa.* Scientific reports, 2013. **3**(1): p. 1-11.

9. Charlwood, J.D. and Braganca, M., *The effect of rainstorms on adult Anopheles funestus behavior and survival.* Journal of Vector Ecology, 2012. **37**(1): p. 252-256.

10. Christiansen-Jucht, C., Erguler, K., Shek, C.Y., Basanez, M.-G., and Parham, P.E., *Modelling Anopheles gambiae ss population dynamics with temperature-and age-dependent survival.* International journal of environmental research public health, 2015b. **12**(6): p. 5975-6005.

11. Culler, L.E., Ayres, M.P., and Virginia, R.A., *In a warmer Arctic, mosquitoes avoid increased mortality from predators by growing faster.* Proceedings of the Royal Society B: Biological Sciences, 2015. **282**(1815): p. 20151549.

12. Ewing, D.A., Cobbold, C.A., Purse, B., Nunn, M., and White, S.M., *Modelling the effect of temperature on the seasonal population dynamics of temperate mosquitoes.* Journal of theoretical biology, 2016. **400**: p. 65-79.

13. Glunt, K.D., Blanford, J.I., and Paaijmans, K.P., *Chemicals, climate, and control: increasing the effectiveness of malaria vector control tools by considering relevant temperatures.* PLoS Pathogens, 2013. **9**(10): p. e1003602.

14. Gonçalvez De Carvalho, S.C., De Jesus Martins Jr, A., Pereira Lima, J.B., and Valle, D., *Temperature influence on embryonic development of Anopheles albitarsis and Anopheles aquasalis.* Memorias do Instituto Oswaldo Cruz, 2002. **97**(8): p. 1117-1120.

15. Lindsay, S.W., Wilkins, H.A., Zieler, H.A., Daly, R.J., Petrarca, V., and Byass, P., *Ability of Anopheles gambiae mosquitoes to transmit malaria during the dry and wet seasons in an area of irrigated rice cultivation in The Gambia.* Journal of Tropical Medicine and Hygiene, 1991. **94**(5): p. 313-324.

16. Lunde, T.M., Bayoh, M.N., and Lindtjørn, B., *How malaria models relate temperature to malaria transmission.* Parasites and Vectors, 2013. **6**(1): p. 1-10.

17. Lyons, C.L., Coetzee, M., Terblanche, J.S., and Chown, S.L., *Desiccation tolerance as a function of age, sex, humidity and temperature in adults of the African malaria vectors Anopheles arabiensis and Anopheles funestus.* Journal of Experimental Biology, 2014. **217**(21): p. 3823-3833.

18. Mordecai, E.A., Paaijmans, K.P., Johnson, L.R., Balzer, C., Ben‐Horin, T., de Moor, E., et al., *Optimal temperature for malaria transmission is dramatically lower than previously predicted.* Ecology letters, 2013. **16**(1): p. 22-30.

19. Mukhtar, A.Y.A., Munyakazi, J.B., and Ouifki, R., *Assessing the role of climate factors on malaria transmission dynamics in South Sudan.* Mathematical Biosciences, 2019. **310**: p. 13-23.

20. Murdock, C., Sternberg, E., and Thomas, M., *Malaria transmission potential could be reduced with current and future climate change.* Scientific reports, 2016. **6**(1): p. 1-7.

21. Murdock, C.C., Paaijmans, K.P., Cox-Foster, D., Read, A.F., and Thomas, M.B., *Rethinking vector immunology: the role of environmental temperature in shaping resistance.* Nature Reviews Microbiology, 2012. **10**(12): p. 869.

22. Okechukwu, R., Okereke, J., Ezejiofor, T., Obasi, K., and Ebere, G., *Relationship between malaria vector densities in artificial container habitats, land-use changes and temperature.* Nigerian Journal of Parasitology, 2011. **32**(2).

23. Okuneye, K., Eikenberry, S.E., and Gumel, A.B., *Weather-driven malaria transmission model with gonotrophic and sporogonic cycles.* Journal of biological dynamics, 2019. **13**(sup1): p. 288-324.

24. Owiti, Y.J. and Christopher, M.J.J.J.o.B.S., *Effect of Temperature and pH on Egg Viability and Pupation of Anopheles arabiensis Patton (Diptera: Culicidae): Prospect for Optimizing Colony Reproduction Procedures.* 2017. **10**(1).

25. Owusu, H.F., Chitnis, N., and Müller, P., *Insecticide susceptibility of Anopheles mosquitoes changes in response to variations in the larval environment.* Scientific reports, 2017. **7**(1): p. 1-9.

26. Paaijmans, K.P., Blanford, S., Chan, B.H.K., and Thomas, M.B., *Warmer temperatures reduce the vectorial capacity of malaria mosquitoes.* Biology Letters, 2012. **8**(3): p. 465-468.

27. Paaijmans, K.P., Imbahale, S.S., Thomas, M.B., and Takken, W., *Relevant microclimate for determining the development rate of malaria mosquitoes and possible implications of climate change.* Malaria Journal, 2010. **9**(1).

28. Paaijmans, K.P., Read, A.F., and Thomas, M.B., *Understanding the link between malaria risk and climate.* Proceedings of the National Academy of Sciences of the United States of America, 2009. **106**(33): p. 13844-13849.

29. Parham, P.E. and Michael, E., *Modelling climate change and malaria transmission*, in *Advances in Experimental Medicine and Biology*. 2010a. p. 184-199.

30. Parham, P.E. and Michael, E., *Modeling the effects of weather and climate change on malaria transmission.* Environmental health perspectives, 2010b. **118**(5): p. 620-626.

31. Parham, P.E., Pople, D., Christiansen-Jucht, C., Lindsay, S., Hinsley, W., and Michael, E., *Modeling the role of environmental variables on the population dynamics of the malaria vector Anopheles gambiae sensu stricto.* Malaria Journal, 2012. **11**.

32. Shimaponda-Mataa, N.M., Tembo-Mwase, E., Gebreslasie, M., Achia, T.N., and Mukaratirwa, S., *Modelling the influence of temperature and rainfall on malaria incidence in four endemic provinces of Zambia using semiparametric Poisson regression.* Acta tropica, 2017. **166**: p. 81-91.

33. Wang, X., Tang, S., and Cheke, R.A., *A stage structured mosquito model incorporating effects of precipitation and daily temperature fluctuations.* Journal of theoretical biology, 2016. **411**: p. 27-36.

34. Wei-Ming, W., Hua-Yun, Z., Jun, C., Guo-Jing, Y., Ju-Lin, L., Ya-Ping, G., et al., *Impact of different temperatures on development of Anopheles anthropoghagus in Jiangsu Province.* Zhongguo xue xi chong bing fang zhi za zhi = Chinese journal of schistosomiasis control, 2011. **23**(5): p. 571-574.

35. Yamana, T.K. and Eltahir, E.A., *Incorporating the effects of humidity in a mechanistic model of Anopheles gambiae mosquito population dynamics in the Sahel region of Africa.* Parasites and vectors, 2013. **6**(1): p. 1-10.

36. Zakharova, N.F., Losev, G.I., and Iakubovich, V., *The effect of density and temperature on the larval populations of the malaria vector Anopheles sacharovi.* Med Parazitol (Mosk), 1990(1): p. 3-7.
